# Supplementary material for: Anion Coordination into Ligand Clefts
Source: MDPI journal article supplement (doi:10.3390/cryst13050823), 2023-05-16
Supplement: s1 [file s1]

# Supplementary Materials

## Anion Coordination into Ligand Clefts

Matteo Savastano\*, Carlotta Cappanni, Carla Bazzicalupi\*, Antonio Bianchi

Department of Chemistry “Ugo Schiff”, University of Florence, Via della Lastruccia, 3-13, 50019 Sesto Fiorentino, Italy.

\* Correspondence: [matteo.savastano@unifi.it](mailto:matteo.savastano@unifi.it) (M.S.); [carla.bazzicalupi@unifi.it](mailto:carla.bazzicalupi@unifi.it) (C.B.)

## Content

|                                                                                                                                                      |    |
|------------------------------------------------------------------------------------------------------------------------------------------------------|----|
| <b>Figure S1.</b> Labelling schemes for anion complex structures.                                                                                    | S2 |
| <b>Figure S2.</b> Pairs of hydrogen bonded ligands (same colour) joined in a H-bond network via cocrystallized solvent molecules.                    | S3 |
| <b>Figure S3.</b> Selected short contacts (H-bonds and anion- $\pi$ ) in the perchlorate complex.                                                    | S4 |
| <b>Figure S4.</b> Selected short contacts (H-bonds and anion- $\pi$ ) in the perrhenate complex.                                                     | S5 |
| <b>Figure S5.</b> Details of the dihedral angles formed by the pyridine-pyridine-pyrimidine rings' sequence in the perchlorate and perrhenate salts. | S6 |

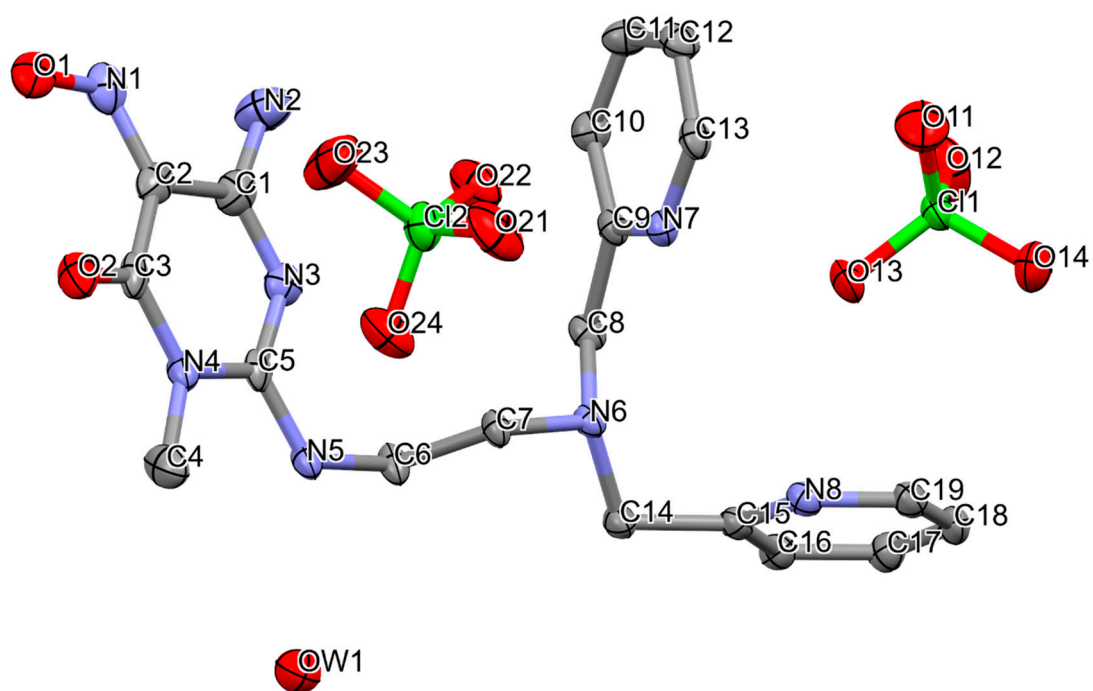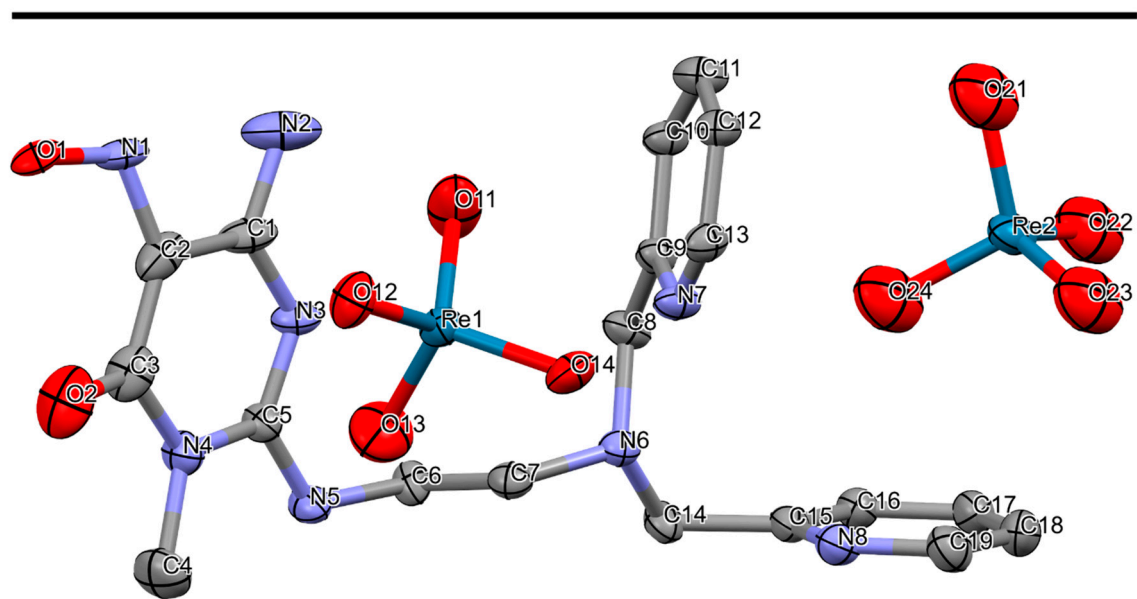

**Figure S1.** Labelling schemes for anion complex structures.

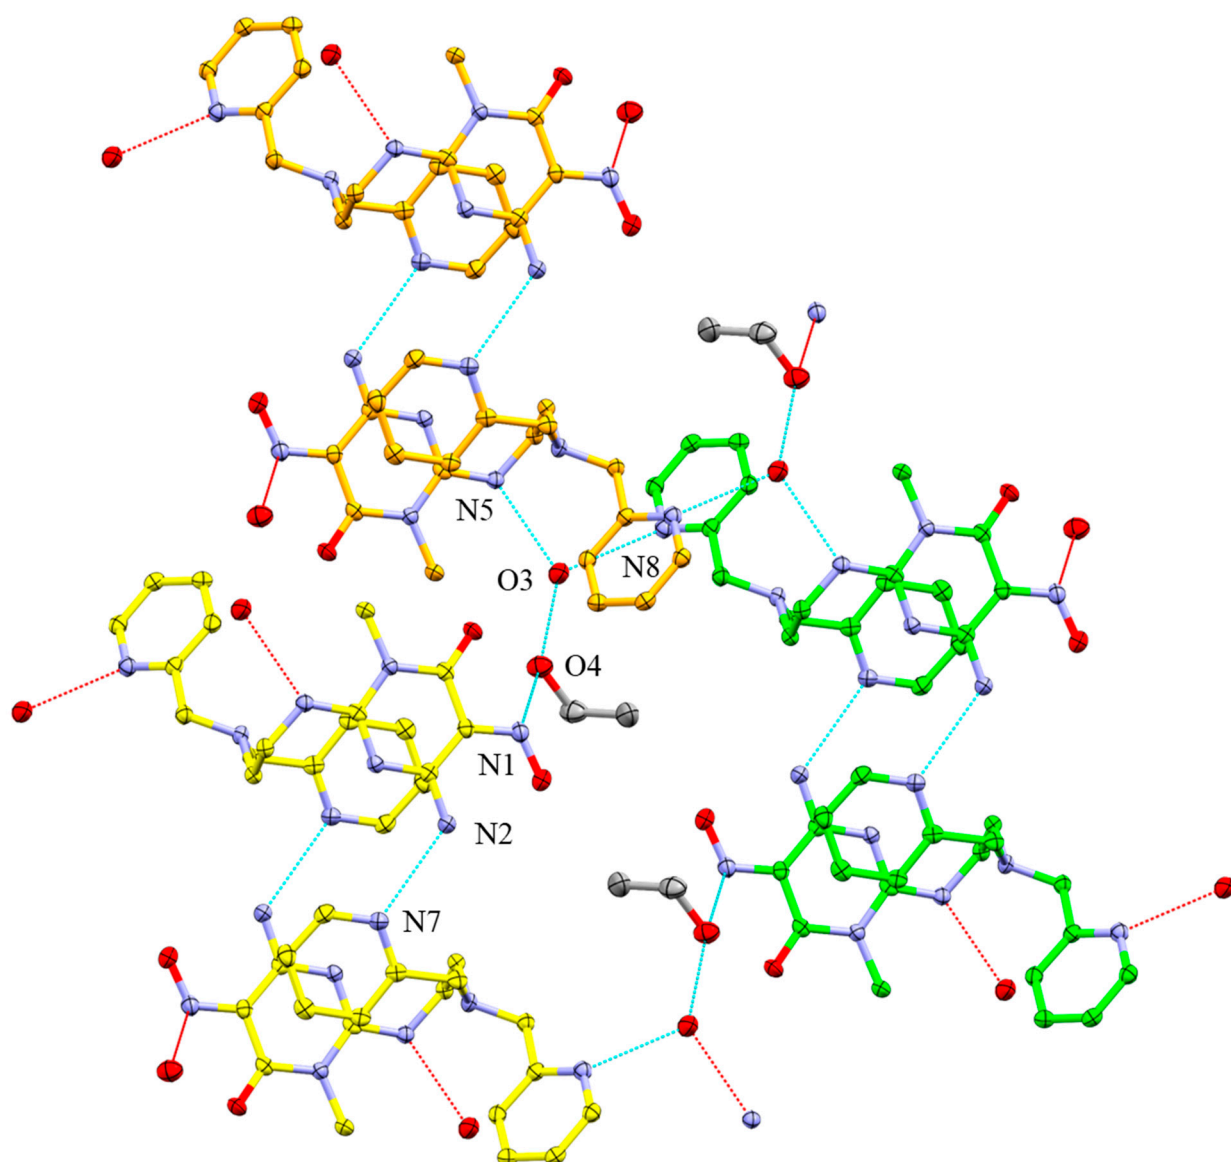

**Figure S2.** Pairs of hydrogen bonded ligands (same colour) joined in a H-bond network via cocrystallized solvent molecules.

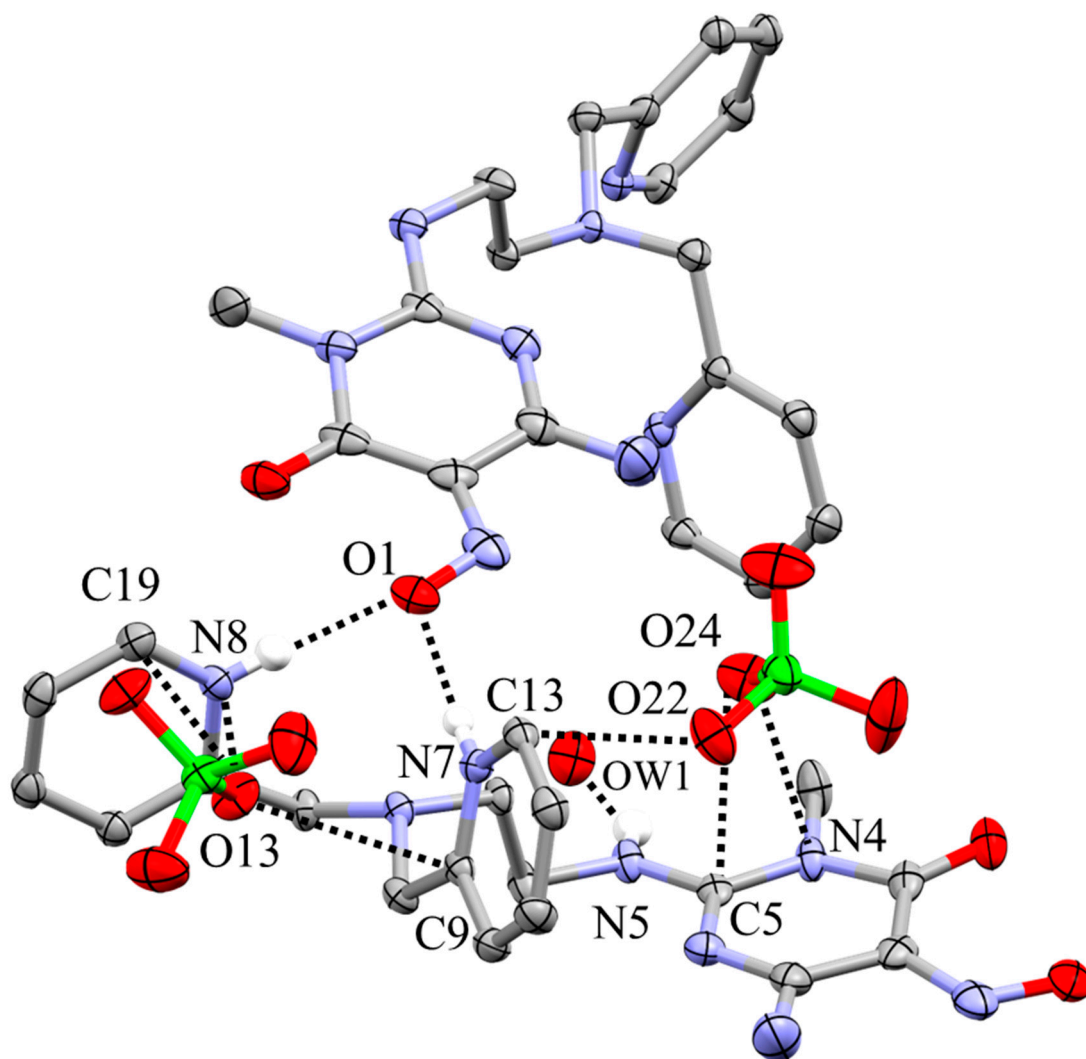

**Figure S3.** Selected short contacts (H-bonds and anion- $\pi$ ) in the perchlorate complex.

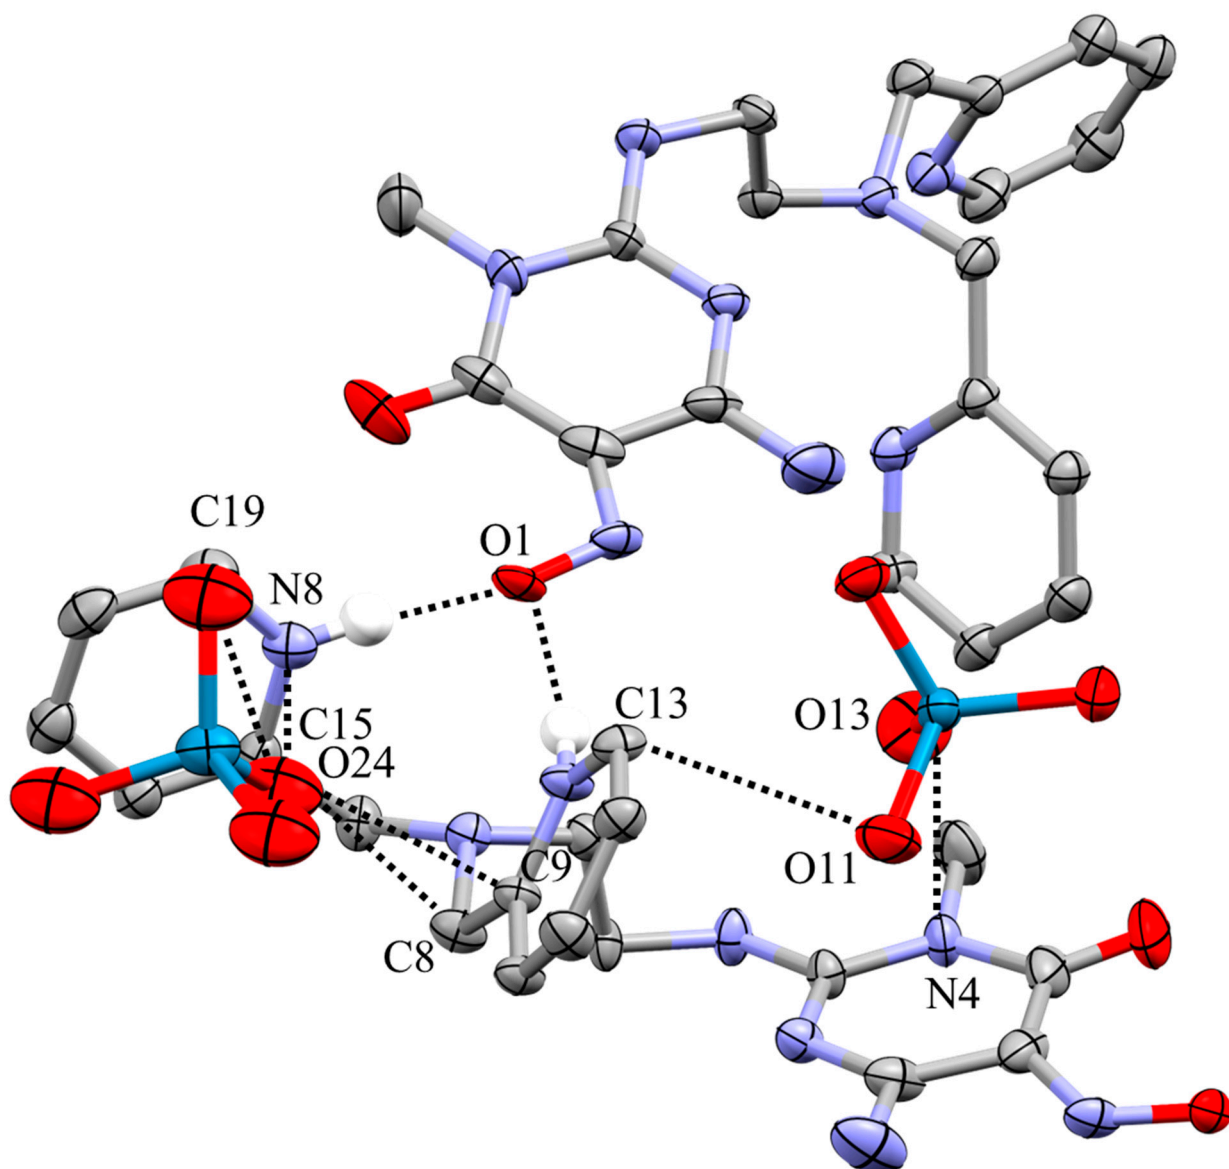

**Figure S4.** Selected short contacts (H-bonds and anion- $\pi$ ) in the perrhenate complex.

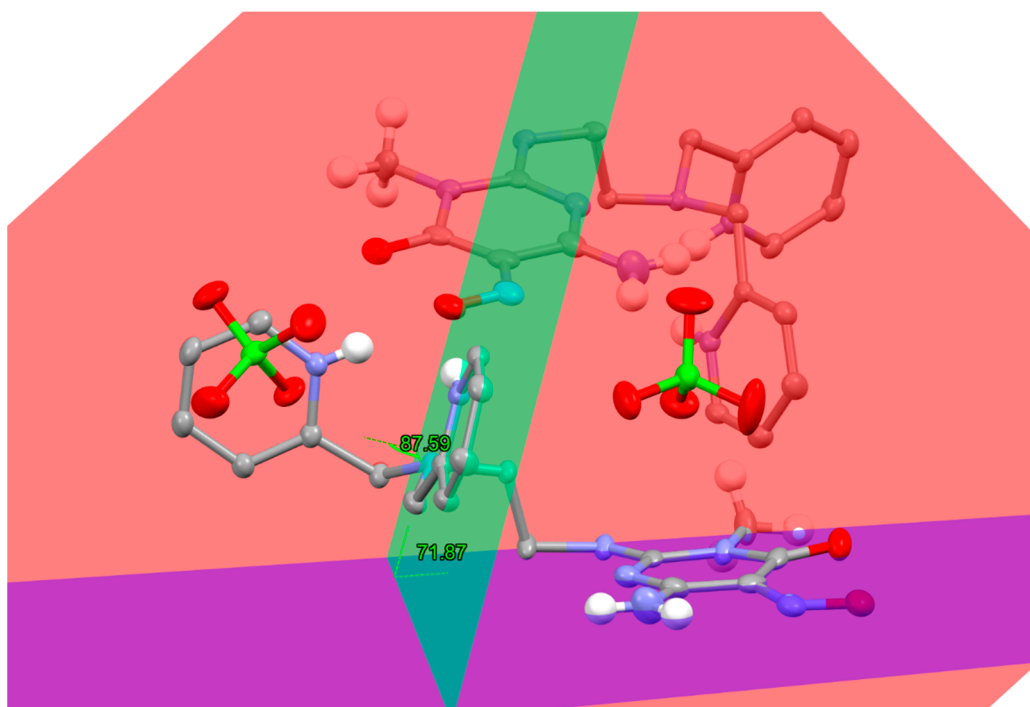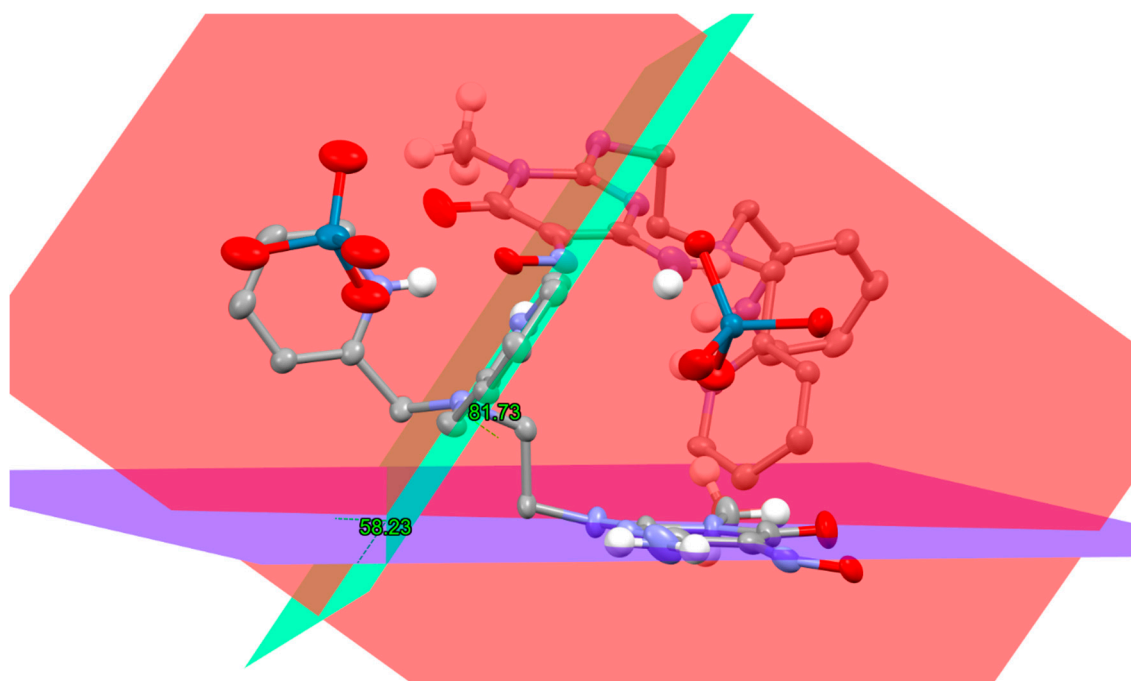

**Figure S5.** Details of the dihedral angles formed by the pyridine-pyridine-pyrimidine rings' sequence in the perchlorate and perrhenate salts.
